# Supplementary material for: Uptake of childhood influenza vaccine from 2012–2013 to 2014–2015 in the UK and the implications for high-risk children: a retrospective observational cohort study
Source: PubMed Central journal article supplement — BMJ Open. 2016 Aug 1;6(8):e010625. doi: 10.1136/bmjopen-2015-010625 (PMC4985803; doi:10.1136/bmjopen-2015-010625), 2016-08-01
Supplement: bmjopen-2015-010625supp_tables.pdf [file bmjopen-2015-010625supp_tables.pdf]

**Supplementary Table A. Hazard ratios of the predictors of influenza vaccination rate among children and adolescents without high-risk condition; presentation by age group and season**

| Season 2012/2013 | 2–3 year olds |             |        | 4–8 year olds |             |        | 9–17 year olds |             |        |
|------------------|---------------|-------------|--------|---------------|-------------|--------|----------------|-------------|--------|
|                  | Estimate      | 95% CI      | P      | Estimate      | 95% CI      | p      | Estimate       | 95% CI      | p      |
| <b>Sex</b>       |               |             |        |               |             |        |                |             |        |
| Male             | 1.00*         |             |        | 1.00*         |             |        | 1.00*          |             |        |
| Female           | 0.79          | (0.69;0.90) | <0.001 | 0.79          | (0.73;0.86) | <0.001 | 1.12           | (1.06;1.18) | <0.001 |
| <b>Region</b>    |               |             |        |               |             |        |                |             |        |
| England/North    | 1.11          | (0.90;1.35) |        | 0.95          | (0.84;1.08) |        | 0.77           | (0.71;0.85) |        |
| England/Midlands | 0.84          | (0.68;1.03) |        | 0.85          | (0.75;0.95) |        | 0.66           | (0.61;0.72) |        |
| England/South    | 1.00*         |             |        | 1.00*         |             |        | 1.00*          |             |        |
| England/London   | 0.92          | (0.74;1.15) |        | 0.87          | (0.76;0.99) |        | 0.70           | (0.63;0.77) |        |
| Northern Ireland | 1.74          | (1.29;2.30) |        | 1.82          | (1.53;2.15) |        | 1.27           | (1.12;1.44) |        |
| Scotland         | 1.04          | (0.82;1.30) |        | 0.88          | (0.76;1.02) |        | 0.90           | (0.82;0.99) |        |
| Wales            | 1.09          | (0.86;1.39) | <0.001 | 0.91          | (0.78;1.06) | <0.001 | 0.78           | (0.70;0.86) | <0.001 |

\*reference group.

**Supplementary Table A continued. Hazard ratios of the predictors of influenza vaccination rate among children and adolescents without high-risk condition; presentation by age group and season**

| Season 2013/2014 | 2–3 year olds |             |        | 4–8 year olds |             |        | 9–17 year olds |             |        |
|------------------|---------------|-------------|--------|---------------|-------------|--------|----------------|-------------|--------|
|                  | Estimate      | 95% CI      | p      | Estimate      | 95% CI      | p      | Estimate       | 95% CI      | p      |
| <b>Sex</b>       |               |             |        |               |             |        |                |             |        |
| Male             | 1.00*         |             |        | 1.00*         |             |        | 1.00*          |             |        |
| Female           | 1.00          | (0.98;1.02) | 0.80   | 0.94          | (0.91;0.98) | <0.01  | 1.04           | (1.00;1.08) | 0.03   |
| <b>Region</b>    |               |             |        |               |             |        |                |             |        |
| England/North    | 0.94          | (0.91;0.98) |        | 8.98          | (8.36;9.67) |        | 2.48           | (2.32;2.64) |        |
| England/Midlands | 0.95          | (0.92;0.98) |        | 0.83          | (0.74;0.93) |        | 0.68           | (0.62;0.74) |        |
| England/South    | 1.00*         |             |        | 1.00*         |             |        | 1.00*          |             |        |
| England/London   | 0.69          | (0.67;0.71) |        | 5.13          | (4.75;5.55) |        | 1.51           | (1.40;1.63) |        |
| Northern Ireland | 1.93          | (1.84;2.02) |        | 1.79          | (1.52;2.08) |        | 4.57           | (4.22;4.93) |        |
| Scotland         | 1.23          | (1.20;1.28) |        | 5.81          | (5.37;6.28) |        | 5.22           | (4.93;5.52) |        |
| Wales            | 0.82          | (0.79;0.85) | <0.001 | 0.92          | (0.80;1.06) | <0.001 | 4.15           | (3.89;4.41) | <0.001 |

\*reference group.

**Supplementary Table A continued. Hazard ratios of the predictors of influenza vaccination rate among children and adolescents without high-risk condition; presentation by age group and season**

| Season 2014/2015 | 2–3 year olds |             |        | 4–8 year olds |             |        | 9–17 year olds |             |        |
|------------------|---------------|-------------|--------|---------------|-------------|--------|----------------|-------------|--------|
|                  | Estimate      | 95% CI      | p      | Estimate      | 95% CI      | p      | Estimate       | 95% CI      | p      |
| <b>Sex</b>       |               |             |        |               |             |        |                |             |        |
| Male             | 1.00*         |             |        | 1.00*         |             |        | 1.00*          |             |        |
| Female           | 0.99          | (0.97;1.01) | 0.40   | 0.98          | (0.95;1.00) | 0.08   | 1.06           | (1.03;1.09) | <0.001 |
| <b>Region</b>    |               |             |        |               |             |        |                |             |        |
| England/North    | 0.90          | (0.86;0.93) |        | 1.73          | (1.65;1.81) |        | 2.59           | (2.41;2.77) |        |
| England/Midlands | 0.89          | (0.86;0.92) |        | 1.25          | (1.20;1.31) |        | 3.96           | (3.73;4.19) |        |
| England/South    | 1.00*         |             |        | 1.00*         |             |        | 1.00*          |             |        |
| England/London   | 0.66          | (0.64;0.69) |        | 0.89          | (0.84;0.94) |        | 1.01           | (0.92;1.10) |        |
| Northern Ireland | 1.95          | (1.86;2.04) |        | 0.62          | (0.56;0.68) |        | 1.30           | (1.15;1.47) |        |
| Scotland         | 1.19          | (1.15;1.23) |        | 5.85          | (5.65;6.05) |        | 7.70           | (7.30;8.13) |        |
| Wales            | 0.81          | (0.77;0.84) | <0.001 | 0.90          | (0.85;0.96) | <0.001 | 3.54           | (3.32;3.77) | <0.001 |

\*reference group.

**Supplementary Table B. Hazard ratios of the predictors of influenza vaccination rate among children and adolescents with high-risk condition; presentation by age group and season**

| Season 2012/2013                   | 2–3 year olds |             |        | 4–8 year olds |             |        | 9–17 year olds |             |        |
|------------------------------------|---------------|-------------|--------|---------------|-------------|--------|----------------|-------------|--------|
|                                    | Estimate      | 95% CI      | p      | Estimate      | 95% CI      | p      | Estimate       | 95% CI      | p      |
| <b>Region</b>                      |               |             |        |               |             |        |                |             |        |
| England/North                      | 1.15          | (0.96;1.36) |        | 1.11          | (1.02;1.20) |        | 1.06           | (1.01;1.12) |        |
| England/Midlands                   | 1.31          | (1.12;1.54) |        | 1.12          | (1.04;1.21) |        | 1.05           | (1.00;1.10) |        |
| England/South                      | 1.00*         |             |        | 1.00*         |             |        | 1.00*          |             |        |
| England/London                     | 0.92          | (0.74;1.13) |        | 0.82          | (0.75;0.90) |        | 0.85           | (0.79;0.90) |        |
| Northern Ireland                   | 1.94          | (1.49;2.48) |        | 1.73          | (1.55;1.93) |        | 1.64           | (1.52;1.76) |        |
| Scotland                           | 1.06          | (0.86;1.30) |        | 1.10          | (1.00;1.20) |        | 1.12           | (1.06;1.18) |        |
| Wales                              | 0.84          | (0.86;1.30) | <0.001 | 0.77          | (0.69;0.85) | <0.001 | 0.85           | (0.80;0.90) | <0.001 |
| <b>Clinical Risk Group</b>         |               |             |        |               |             |        |                |             |        |
| Chronic respiratory disease/asthma | 1.00*         |             |        | 1.00*         |             |        | 1.00*          |             |        |
| Chronic heart disease              | 0.80          | (0.69;0.92) |        | 0.64          | (0.59;0.70) |        | 0.54           | (0.50;0.58) |        |
| Chronic neurological disease       | 0.73          | (0.58;0.91) |        | 0.69          | (0.61;0.78) |        | 0.60           | (0.55;0.65) |        |
| Diabetes                           | 1.45          | (0.81;2.37) |        | 1.98          | (1.71;2.27) |        | 1.89           | (1.77;2.02) |        |
| Other clinical risk group**        | 1.44          | (1.15;1.78) | <0.001 | 1.24          | (1.11;1.39) | <0.001 | 1.12           | (1.06;1.19) | <0.001 |

\*reference group.

\*\*chronic kidney disease, chronic liver disease, immunosuppression, or pregnancy.

**Supplementary Table B continued. Hazard ratios of the predictors of influenza vaccination rate among children and adolescents with high-risk condition; presentation by age group and season**

| Season 2013/2014                   | 2–3 year olds |             |       | 4–8 year olds |             |        | 9–17 year olds |             |        |
|------------------------------------|---------------|-------------|-------|---------------|-------------|--------|----------------|-------------|--------|
|                                    | Estimate      | 95% CI      | p     | Estimate      | 95% CI      | p      | Estimate       | 95% CI      | p      |
| <b>Region</b>                      |               |             |       |               |             |        |                |             |        |
| England/North                      | 1.00          | (0.86;1.17) |       | 1.39          | (1.29;1.51) |        | 1.11           | (1.05;1.18) |        |
| England/Midlands                   | 0.95          | (0.81;1.11) |       | 1.15          | (1.07;1.25) |        | 1.07           | (1.01;1.13) |        |
| England/South                      | 1.00*         |             |       | 1.00*         |             |        | 1.00*          |             |        |
| England/London                     | 0.83          | (0.70;0.98) |       | 0.90          | (0.82;0.98) |        | 0.81           | (0.76;0.87) |        |
| Northern Ireland                   | 1.41          | (1.09;1.80) |       | 1.62          | (1.45;1.81) |        | 1.56           | (1.45;1.68) |        |
| Scotland                           | 1.15          | (0.98;1.35) |       | 1.27          | (1.17;1.39) |        | 1.21           | (1.15;1.28) |        |
| Wales                              | 0.86          | (0.70;1.04) | 0.001 | 0.81          | (0.73;0.89) | <0.001 | 0.91           | (0.86;0.97) | <0.001 |
| <b>Clinical Risk Group</b>         |               |             |       |               |             |        |                |             |        |
| Chronic respiratory disease/asthma | 1.00*         |             |       | 1.00*         |             |        | 1.00*          |             |        |
| Chronic heart disease              | 0.89          | (0.79;1.00) |       | 0.66          | (0.61;0.72) |        | 0.58           | (0.54;0.62) |        |
| Chronic neurological disease       | 0.82          | (0.68;0.99) |       | 0.67          | (0.59;0.76) |        | 0.63           | (0.57;0.68) |        |
| Diabetes                           | 1.17          | (0.72;1.79) |       | 1.79          | (1.53;2.07) |        | 1.79           | (1.67;1.91) |        |
| Other clinical risk group**        | 1.13          | (0.91;1.39) | 0.04  | 1.20          | (1.07;1.33) | <0.001 | 1.02           | (0.96;1.09) | <0.001 |

\*reference group.

\*\*chronic kidney disease, chronic liver disease, immunosuppression, or pregnancy.

**Supplementary Table B continued. Hazard ratios of the predictors of influenza vaccination rate among children and adolescents with high-risk condition; presentation by age group and season**

| Season 2014/2015                   | 2–3 year olds |             |        | 4–8 year olds |             |        | 9–17 year olds |             |        |
|------------------------------------|---------------|-------------|--------|---------------|-------------|--------|----------------|-------------|--------|
|                                    | Estimate      | 95% CI      | p      | Estimate      | 95% CI      | p      | Estimate       | 95% CI      | p      |
| <b>Region</b>                      |               |             |        |               |             |        |                |             |        |
| England/North                      | 0.94          | (0.78;1.12) |        | 1.15          | (1.05;1.26) |        | 1.06           | (0.99;1.13) |        |
| England/Midlands                   | 0.89          | (0.73;1.07) |        | 1.11          | (1.02;1.20) |        | 1.11           | (1.05;1.18) |        |
| England/South                      | 1.00*         |             |        | 1.00*         |             |        | 1.00*          |             |        |
| England/London                     | 0.76          | (0.61;0.93) |        | 0.79          | (0.71;0.88) |        | 0.78           | (0.72;0.84) |        |
| Northern Ireland                   | 1.67          | (1.27;2.17) |        | 0.48          | (0.40;0.56) |        | 1.20           | (1.10;1.30) |        |
| Scotland                           | 1.18          | (0.98;1.41) |        | 1.08          | (0.99;1.18) |        | 1.10           | (1.04;1.17) |        |
| Wales                              | 0.92          | (0.76;1.11) | <0.001 | 0.82          | (0.74;0.90) | <0.001 | 0.88           | (0.82;0.94) | <0.001 |
| <b>Clinical Risk Group</b>         |               |             |        |               |             |        |                |             |        |
| Chronic respiratory disease/asthma | 1.00*         |             |        | 1.00*         |             |        | 1.00*          |             |        |
| Chronic heart disease              | 0.86          | (0.75;0.98) |        | 0.74          | (0.68;0.81) |        | 0.59           | (0.54;0.63) |        |
| Chronic neurological disease       | 0.68          | (0.54;0.85) |        | 0.72          | (0.63;0.82) |        | 0.60           | (0.55;0.66) |        |
| Diabetes                           | 2.29          | (1.46;3.38) |        | 1.51          | (1.27;1.78) |        | 1.72           | (1.60;1.85) |        |
| Other clinical risk group**        | 1.21          | (0.94;1.53) | <0.001 | 1.03          | (0.92;1.16) | <0.001 | 1.00           | (0.93;1.07) | <0.001 |

\*reference group.

\*\*chronic kidney disease, chronic liver disease, immunosuppression, or pregnancy
